# Supplementary material
Source: HighWire-hosted journal article supplement (https://www.g3journal.org/content/suppl/2018/01/22/g3.117.300354)

## Supplementary Tables

**Table S1.** ANOVA table of the final model after step-wise regression selecting the best fitting model based on Akaike Information Criterion (AIC) for data simulated with NN competition function. Correlation (COR) between true and predicted values of direct genotypic effect is the response variable. Explanatory variables are Model (various models such as Base (with direct genotypic effect only), Dir\_NN (with direct and NN competition genotypic effect), Dir\_SD (with direct and SD competition genotypic effects), Dir\_FD (with direct and FD competition genotypic effect)), fraE (fraction of error variance: 0.3, 0.6, and 0.9 are the three values used), Gcor (correlation between direct and competition effects: 0 and 0.4 are the two values used), Ecor (correlation between competition and residual error effects: 0 and 0.8 are the two values used), h2 (direct genotypic ratio 0.3 and 0.7 are the two values used), cVar (competition genotypic variance: values ranging from 0.1 to 1), rep indicates the percentage of test genotypes replicated. Explanatory variables are same for all the ANOVA tables from simulation.

### Analysis of Variance Table

Response: COR

|       | Df | Sum Sq  | Mean Sq | F value    | Pr(>F)    |     |
|-------|----|---------|---------|------------|-----------|-----|
| Model | 3  | 4.094   | 1.365   | 334.4446   | < 2.2e-16 | *** |
| fraE  | 1  | 0.022   | 0.022   | 5.3439     | 0.0208052 | *   |
| Gcor  | 1  | 0.059   | 0.059   | 14.4961    | 0.0001409 | *** |
| Ecor  | 1  | 0.000   | 0.000   | 0.0265     | 0.8705954 |     |
| h2    | 1  | 222.346 | 222.346 | 54489.0978 | < 2.2e-16 | *** |
| cVar  | 1  | 0.901   | 0.901   | 220.7939   | < 2.2e-16 | *** |

```

rep          1  77.457  77.457 18982.0652 < 2.2e-16 ***
Model:fraE  3   1.026   0.342   83.8324 < 2.2e-16 ***
Model:Gcor  3   0.111   0.037    9.0967 5.163e-06 ***
Model:Ecor  3   0.030   0.010    2.4147 0.0645415 .
Model:h2    3   0.725   0.242   59.2277 < 2.2e-16 ***
Model:cVar  3   0.290   0.097   23.6660 2.779e-15 ***
Model:rep   3   0.048   0.016    3.9256 0.0082004 **
fraE:rep    1   0.138   0.138   33.8754 5.968e-09 ***
h2:rep      1   2.166   2.166  530.8690 < 2.2e-16 ***
cVar:rep    1   0.243   0.243   59.5233 1.267e-14 ***
fraE:h2     1   0.170   0.170   41.7213 1.078e-10 ***
fraE:cVar   1   0.055   0.055   13.4513 0.0002455 ***
Gcor:cVar   1   0.022   0.022    5.3539 0.0206863 *
Ecor:h2     1   0.143   0.143   35.1451 3.112e-09 ***
h2:cVar     1   1.474   1.474  361.1118 < 2.2e-16 ***
Residuals 19404 79.179   0.004
---
Signif. codes:  0 '***', 0.001 '**', 0.01 '*', 0.05 '.'

```

**Table S2.** ANOVA table of the final model after step-wise regression for data simulated with SD competition function.

Correlation between true and predicted values of direct genotypic effect is the response variable. Explanatory variables are same as those described in Table S1.

Analysis of Variance Table

Response: COR

|            | Df | Sum Sq | Mean Sq | F value    | Pr(>F)    |     |
|------------|----|--------|---------|------------|-----------|-----|
| Model      | 3  | 65.342 | 21.781  | 3354.6369  | < 2.2e-16 | *** |
| fraE       | 1  | 0.057  | 0.057   | 8.7162     | 0.0031581 | **  |
| Gcor       | 1  | 1.149  | 1.149   | 176.9584   | < 2.2e-16 | *** |
| Ecor       | 1  | 0.791  | 0.791   | 121.8203   | < 2.2e-16 | *** |
| h2         | 1  | 84.003 | 84.003  | 12937.9872 | < 2.2e-16 | *** |
| cVar       | 1  | 53.728 | 53.728  | 8275.1304  | < 2.2e-16 | *** |
| rep        | 1  | 25.232 | 25.232  | 3886.2238  | < 2.2e-16 | *** |
| Model:fraE | 3  | 0.117  | 0.039   | 6.0307     | 0.0004228 | *** |
| Model:Gcor | 3  | 4.621  | 1.540   | 237.2658   | < 2.2e-16 | *** |
| Model:Ecor | 3  | 0.010  | 0.003   | 0.5306     | 0.6612864 |     |
| Model:h2   | 3  | 5.898  | 1.966   | 302.8051   | < 2.2e-16 | *** |
| Model:cVar | 3  | 6.352  | 2.117   | 326.1190   | < 2.2e-16 | *** |
| Model:rep  | 3  | 1.134  | 0.378   | 58.2329    | < 2.2e-16 | *** |
| fraE:rep   | 1  | 0.022  | 0.022   | 3.3651     | 0.0666079 | .   |
| Gcor:rep   | 1  | 0.445  | 0.445   | 68.6034    | < 2.2e-16 | *** |
| Ecor:rep   | 1  | 0.010  | 0.010   | 1.5251     | 0.2168590 |     |
| h2:rep     | 1  | 0.610  | 0.610   | 93.9223    | < 2.2e-16 | *** |
| cVar:rep   | 1  | 1.342  | 1.342   | 206.7244   | < 2.2e-16 | *** |
| fraE:Ecor  | 1  | 0.030  | 0.030   | 4.6300     | 0.0314301 | *   |
| Gcor:Ecor  | 1  | 0.000  | 0.000   | 0.0141     | 0.9054234 |     |
| Gcor:cVar  | 1  | 0.265  | 0.265   | 40.8739    | 1.664e-10 | *** |
| Ecor:h2    | 1  | 0.072  | 0.072   | 11.0572    | 0.0008852 | *** |
| Ecor:cVar  | 1  | 0.077  | 0.077   | 11.8465    | 0.0005790 | *** |

```

h2:cVar      1  11.190  11.190  1723.4452 < 2.2e-16 ***
Residuals 17721 115.057   0.006
---
Signif. codes:  0 '***', 0.001 '**', 0.01 '*', 0.05 '.'

```

**Table S3.** ANOVA table of the final model after step-wise regression for data simulated with NN competition function.

Correlation between true and predicted values of competition genotypic effect is the response variable. Explanatory variables are same as those described in Table S1. The variable Model has only three factors – Comp\_NN (with NN competition genotypic effect), Comp\_SD (with SD competition genotypic effect), and Comp\_FD (with FD competition genotypic effect).

Analysis of Variance Table

```

Response: COR

```

|            | Df | Sum Sq  | Mean Sq | F value    | Pr(>F)    |     |
|------------|----|---------|---------|------------|-----------|-----|
| Model      | 2  | 113.643 | 56.822  | 8098.3487  | < 2.2e-16 | *** |
| fraE       | 1  | 0.774   | 0.774   | 110.3361   | < 2.2e-16 | *** |
| Gcor       | 1  | 0.395   | 0.395   | 56.3460    | 6.430e-14 | *** |
| Ecor       | 1  | 0.161   | 0.161   | 22.8881    | 1.734e-06 | *** |
| h2         | 1  | 7.008   | 7.008   | 998.7715   | < 2.2e-16 | *** |
| cVar       | 1  | 86.149  | 86.149  | 12278.1766 | < 2.2e-16 | *** |
| rep        | 1  | 3.496   | 3.496   | 498.2492   | < 2.2e-16 | *** |
| Model:Gcor | 2  | 0.648   | 0.324   | 46.1442    | < 2.2e-16 | *** |
| Model:Ecor | 2  | 0.766   | 0.383   | 54.5668    | < 2.2e-16 | *** |
| Model:h2   | 2  | 0.976   | 0.488   | 69.5188    | < 2.2e-16 | *** |
| Model:cVar | 2  | 11.205  | 5.603   | 798.5123   | < 2.2e-16 | *** |
| Model:rep  | 2  | 3.570   | 1.785   | 254.3959   | < 2.2e-16 | *** |
| Gcor:rep   | 1  | 0.059   | 0.059   | 8.3805     | 0.0037984 | **  |
| Ecor:rep   | 1  | 0.037   | 0.037   | 5.2937     | 0.0214165 | *   |
| h2:rep     | 1  | 0.316   | 0.316   | 44.9906    | 2.053e-11 | *** |
| cVar:rep   | 1  | 0.075   | 0.075   | 10.6973    | 0.0010754 | **  |

```

fraE:Gcor      1   0.010   0.010     1.4490 0.2287156
fraE:h2        1   0.266   0.266    37.9198 7.565e-10 ***
Gcor:Ecor      1   0.221   0.221    31.5360 1.994e-08 ***
Gcor:cVar      1   0.077   0.077    10.9774 0.0009245 ***
Ecor:h2        1   0.052   0.052     7.3897 0.0065676 **
Ecor:cVar      1   0.034   0.034     4.9045 0.0268024 *
h2:cVar        1   4.038   4.038   575.5661 < 2.2e-16 ***
Residuals    14550 102.089   0.007

```

---

Signif. codes: 0 '\*\*\*', 0.001 '\*\*', 0.01 '\*', 0.05 '.'

**Table S4.** ANOVA table of the final model after step-wise regression for data simulated with SD competition function.

Correlation between true and predicted values of competition genotypic effect is the response variable. Explanatory variables are same as those described in Table S3.

Analysis of Variance Table

```

Response: COR
      Df Sum Sq Mean Sq  F value    Pr(>F)
Model    2 38.840  19.4202 4631.2226 < 2.2e-16 ***
fraE      1  0.010   0.0104   2.4906  0.11459
Gcor      1  0.460   0.4600 109.6875 < 2.2e-16 ***
Ecor      1  0.007   0.0074   1.7593  0.18477
h2        1  1.616   1.6158  385.3231 < 2.2e-16 ***
cVar      1 11.645  11.6452 2777.0841 < 2.2e-16 ***
Model:Gcor  2  0.161   0.0806  19.2226 4.825e-09 ***
Model:h2    2  0.200   0.1000  23.8466 4.925e-11 ***
Model:cVar  2  4.200   2.1002  500.8430 < 2.2e-16 ***
fraE:Ecor  1  0.013   0.0130   3.0921  0.07873 .
Ecor:cVar  1  0.018   0.0183   4.3743  0.03654 *

```

```
h2:cVar      1  0.753  0.7532  179.6171 < 2.2e-16 ***
Residuals 5023 21.063  0.0042
---
Signif. codes:  0 '***', 0.001 '**', 0.01 '*', 0.05 '.'
```

**Table S5.** Best model selected compared to the base for traits root dry matter content (DM), root fresh yield (FYLD) and shoot weight (SHTWT) at harvest, and harvest index (HI) from various experiments. Only the values of base are given in scenarios where it is the best model. Number of observations and unique genotypes available for analysis is given below the trait. Other values are rounded to two decimal digits. Narrow sense heritability ( $h^2$ ) of direct genotypic effect is given. Correlation is calculated based on the best linear unbiased prediction (BLUP) values and residual effects. Competition form is given bracketed with the maximum distance (Dist) covered and/or parameter values. Chi-square statistic, calculated from the log likelihood values of the Base and Model 1 or 2, is given with p-value (in brackets). Significant values at  $\alpha = 0.1$  are bolded.

| Data           | Trait                  | Model  | Variance     |              |              |              | pRMSE | $h^2$ | Correlation |             | Competition Form                           | $\chi$ -square                |
|----------------|------------------------|--------|--------------|--------------|--------------|--------------|-------|-------|-------------|-------------|--------------------------------------------|-------------------------------|
|                |                        |        | $\sigma_g^2$ | $\sigma_c^2$ | $\sigma_p^2$ | $\sigma_r^2$ |       |       | $\rho_{gc}$ | $\rho_{cr}$ |                                            |                               |
| Ibadan_2013_C1 | DM<br>(511&<br>488)    | Base   | 16.16        | NA           | NA           | 6.13         | 3.79  | 0.27  | NA          | NA          | NA                                         | 1.44<br>(0.229)               |
|                |                        | Model1 | 16.28        | 0.43         | NA           | 5.56         | 3.79  | 0.28  | 0.01        | -0.13       | NN (along the long edge)                   |                               |
|                | FYLD<br>(646 &<br>617) | Base   | 7.43         | NA           | NA           | 19.79        | 4.96  | 0.68  | NA          | NA          | NA                                         | <b>9.31</b><br><b>(0.002)</b> |
|                |                        | Model1 | 7.15         | 0.35         | NA           | 17.83        | 4.91  | 0.68  | -0.05       | 0.00        | Slow decay<br>(Dist = 5m;<br>$b = 0.001$ ) |                               |
|                | HI<br>(648 &<br>628)   | Base   | 5e-3         | NA           | NA           | 9e-3         | 0.11  | 0.44  | NA          | NA          | NA                                         | <b>8.23</b>                   |
|                |                        | Model1 | 5e-3         | < 5e-3       | NA           | 8e-3         | 0.11  | 0.46  | -0.05       | -0.06       | Fast decay<br>( $k = 0.4$ )                | <b>(0.004)</b>                |
| Base           |                        | 10.20  | NA           | NA           | 11.89        | 4.19         | 0.57  | NA    | NA          | NA          | <b>15.52</b>                               |                               |

|                 |                    |        |        |        |       |        |       |       |       |                   |                                       |                  |
|-----------------|--------------------|--------|--------|--------|-------|--------|-------|-------|-------|-------------------|---------------------------------------|------------------|
| Ibadan_2014_PYT | SHTW T(660 & 631)  | Model1 | 9.02   | 0.26   | NA    | 10.76  | 4.12  | 0.59  | -0.14 | 0.03              | Slow decay (Dist = 5m; $b = 0.001$ )  | <b>(8.1e-05)</b> |
|                 | FYLD (152 & 81)    | Base   | 40.54  | NA     | NA    | 77.01  | 10.6  | 0.63  | NA    | NA                | NA                                    | 2.49             |
|                 |                    | Model1 | 35.87  | 2.829  | NA    | 68.13  | 10.54 | 0.64  | -0.15 | -0.17             | Slow decay (Dist = 10m; $b = 0.001$ ) | (0.114)          |
|                 | HI (154 & 81)      | Base   | 6e-3   | NA     | NA    | 7e-3   | 0.11  | 0.46  | NA    | NA                | NA                                    | <b>3.17</b>      |
|                 |                    | Model1 | 6e-3   | < 5e-3 | NA    | 6e-3   | 0.11  | 0.40  | -0.14 | -0.08             | Slow decay (Dist = 10m; $b = 0.001$ ) | <b>(0.075)</b>   |
|                 | *SHTW T(151 & 81)  | Base   | 23.56  | NA     | NA    | 101.2  | 11.03 | 0.77  | NA    | NA                | NA                                    | <b>5.93</b>      |
| Model2          |                    | 24.53  | NA     | 27.46  | 60.52 | 10.53  | 0.67  | -0.02 | 0.07  | Competition error | <b>(0.01)</b>                         |                  |
| DM(14 8 & 80)   | Base               | 15.86  | NA     | NA     | 15.42 | 5.06   | 0.39  | NA    | NA    | NA                | NA                                    |                  |
| Ibadan_2014_C1  | HI (282 & 265)     | Base   | 0.02   | NA     | NA    | < 5e-3 | 0.10  | 0.46  | NA    | NA                | NA                                    | <b>9.47</b>      |
|                 |                    | Model1 | 0.02   | < 5e-3 | NA    | < 5e-3 | 0.10  | 0.46  | 0.05  | -0.40             | NN (all neighbors)                    | <b>(0.002)</b>   |
|                 | SHTW T (283 & 262) | Base   | 119.60 | NA     | NA    | 189.88 | 16.44 | 0.64  | NA    | NA                | NA                                    | NA               |
|                 | DM(28 2 & 263)     | Base   | 18.76  | NA     | NA    | 2.33   | 3.59  | 0.41  | NA    | NA                | NA                                    | NA               |
|                 | FYLD (286 & 266)   | Base   | 879.06 | NA     | NA    | 49.26  | 23.32 | 0.50  | NA    | NA                | NA                                    | NA               |
| IK              | Base               | 25.10  | NA     | NA     | 4.39  | 4.10   | 0.32  | NA    | NA    | NA                | <b>3.24</b>                           |                  |



|                    |                          |        |            |      |    |            |       |      |       |       |                                            |                |
|--------------------|--------------------------|--------|------------|------|----|------------|-------|------|-------|-------|--------------------------------------------|----------------|
|                    | DM<br>(627 &<br>611)     | Model1 | 25.71      | 0.16 | NA | 3.76       | 4.10  | 0.33 | -0.05 | 0.06  | Fast decay<br>( $\alpha$ 1/Dist)           | <b>(0.072)</b> |
|                    | SHTW<br>T (781<br>& 753) | Base   | 13.31      | NA   | NA | 17.19      | 4.99  | 0.65 | NA    | NA    | NA                                         | <b>4.95</b>    |
|                    |                          | Model1 | 13.66      | 0.17 | NA | 15.95      | 4.98  | 0.64 | -0.16 | -0.05 | Slow decay<br>(Dist = 5m;<br>$b = 0.001$ ) | <b>(0.026)</b> |
|                    | FYLD(<br>758 &<br>735)   | Base   | 8.61       | NA   | NA | 24.00      | 0.18  | 0.70 | NA    | NA    | NA                                         | NA             |
|                    | HI<br>(757 &<br>736)     | Base   | 0.007      | NA   | NA | 0.01       | 0.13  | 0.51 | NA    | NA    | NA                                         | NA             |
| Ikenne_2014_C1     | DM<br>(313 &<br>284)     | Base   | 31.95      | NA   | NA | 0.72       | 4.25  | 0.44 | NA    | NA    | NA                                         | <b>7.31</b>    |
|                    |                          | Model1 | 30.77      | 0.75 | NA | < 5e-<br>3 | 4.21  | 0.44 | -0.06 | -0.51 | NN (along<br>long edge<br>only)            | <b>(0.006)</b> |
|                    | SHTW<br>T(322<br>& 292)  | Base   | 721.0<br>9 | NA   | NA | 29.19      | 20.64 | 0.51 | NA    | NA    | NA                                         | NA             |
|                    | FYLD(<br>323 &<br>292)   | Base   | 1037.<br>0 | NA   | NA | 30.61      | 25.01 | 0.51 | NA    | NA    | NA                                         | NA             |
|                    | HI(321<br>& 292)         | Base   | 0.04       | NA   | NA | <1e-3      | 0.14  | 0.99 | NA    | NA    | NA                                         | NA             |
| Ikenne_<br>2014_C2 | SHTW                     | Base   | 32.53      | NA   | NA | 37.81      | 7.81  | 0.58 | NA    | NA    | NA                                         | 1.59           |
|                    | T (367<br>& 342)         | Model1 | 31.97      | 0.65 | NA | 36.65      | 7.80  | 0.58 | -0.02 | -0.05 | Fast decay<br>( $\alpha$ 1/Dist)           | <b>(0.207)</b> |

|               |                   |        |        |       |       |       |       |       |       |                        |                                       |                |
|---------------|-------------------|--------|--------|-------|-------|-------|-------|-------|-------|------------------------|---------------------------------------|----------------|
|               | FYLD(362 & 335)   | Base   | 5.842  | NA    | NA    | 66.26 | 8.50  | 0.83  | NA    | NA                     | NA                                    | NA             |
|               | DM(315 & 293)     | Base   | 25.09  | NA    | NA    | 2.78  | 4.19  | 0.38  | NA    | NA                     | NA                                    | NA             |
|               | HI(361 & 339)     | Base   | 0.01   | NA    | NA    | 0.02  | 0.17  | 0.70  | NA    | NA                     | NA                                    | NA             |
| Mokwa_2013_C1 | DM(571 & 537)     | Base   | 15.98  | NA    | NA    | 8.86  | 4.10  | 0.37  | NA    | NA                     | NA                                    | 0.29           |
|               |                   | Model1 | 15.99  | 0.01  | NA    | 8.64  | 4.07  | 0.37  | 0.09  | 0.01                   | NN (all neighbors)                    | (0.588)        |
|               | FYLD(734 & 694)   | Base   | 2.47   | NA    | NA    | 18.87 | 4.60  | 0.84  | NA    | NA                     | NA                                    | <b>3.69</b>    |
|               |                   | Model1 | 2.27   | 0.38  | NA    | 17.76 | 4.58  | 0.84  | 0.10  | -0.01                  | Slow decay (Dist = 5m; $b = 0.1$ )    | <b>(0.055)</b> |
|               | HI(744 & 701)     | Base   | 5e-3   | NA    | NA    | 9e-3  | 5.94  | 0.61  | NA    | NA                     | NA                                    | <b>4.38</b>    |
|               | Model1            | 5e-3   | < 5e-3 | NA    | 9e-3  | 5.94  | 0.63  | -0.01 | -0.02 | Fast decay ( $k = 1$ ) | <b>(0.036)</b>                        |                |
|               | SHTW T(749 & 707) | Base   | 3.98   | NA    | NA    | 32.03 | 5.94  | 0.74  | NA    | NA                     | NA                                    | NA             |
| Mokwa_2014_C1 | DM(287 & 264)     | Base   | 27.29  | NA    | NA    | 1.52  | 4.02  | 0.31  | NA    | NA                     | NA                                    | 1.60           |
|               |                   | Model1 | 27.48  | 0.63  | NA    | 1.27  | 4.02  | 0.31  | -0.20 | -0.22                  | Fast decay ( $\alpha 1/\text{Dist}$ ) | (0.205)        |
|               | *FYLD(321 & 296)  | Base   | 67.75  | NA    | NA    | 79.09 | 11.55 | 0.62  | NA    | NA                     | NA                                    | <b>6.21</b>    |
|               | Model2            | 56.70  | NA     | 17.38 | 53.52 | 11.35 | 0.65  | 0.07  | 0.12  | Competition error      | <b>(0.01)</b>                         |                |
|               | SHTW T(313 & 285) | Base   | 123.02 | NA    | NA    | 166.1 | 16.13 | 0.57  | NA    | NA                     | NA                                    | NA             |

|               |                   |      |       |    |    |       |      |      |    |    |    |    |
|---------------|-------------------|------|-------|----|----|-------|------|------|----|----|----|----|
| Mokwa_2014_C2 | HI(311 & 284)     | Base | 0.01  | NA | NA | 0.01  | 0.10 | 0.60 | NA | NA | NA | NA |
|               | FYLD(311 & 286)   | Base | 3.61  | NA | NA | 16.91 | 4.47 | 0.73 | NA | NA | NA | NA |
|               | DM(260 & 239)     | Base | 13.95 | NA | NA | 9.89  | 4.32 | 0.36 | NA | NA | NA | NA |
|               | HI(310 & 286)     | Base | 0.09  | NA | NA | 0.01  | 0.13 | 0.61 | NA | NA | NA | NA |
|               | SHTW T(324 & 300) | Base | 1.74  | NA | NA | 37.67 | 6.27 | 0.91 | NA | NA | NA | NA |

**Table S6:** Results from Model 5 (GS – spatial – competition model) compared to base GS model for traits that showed significant spatial and/or competition effect. Chi-square statistic is calculated from the log likelihood values of Base, or other models against Model 5 are given with p-value (in brackets) at  $\alpha = 0.1$  on their respective rows. For example,  $\chi$ -square statistic in the row of Model 1 is the result of the comparison between Model 1 and Model 5. Significant values are bolded.

| Data         | Trait            | Model  | Variance     |              |              |              |              | $h^2$ | Spatial structure | Competition Form             | $\chi$ -square                |
|--------------|------------------|--------|--------------|--------------|--------------|--------------|--------------|-------|-------------------|------------------------------|-------------------------------|
|              |                  |        | $\sigma_g^2$ | $\sigma_c^2$ | $\sigma_p^2$ | $\sigma_s^2$ | $\sigma_r^2$ |       |                   |                              |                               |
| Mowa_2013_C1 | FYLD (734 & 694) | Base   | 2.47         | NA           | NA           | NA           | 18.87        | 0.84  | NA                | NA                           | <b>7.47</b><br><b>(0.024)</b> |
|              |                  | Model1 | 2.27         | 0.38         | NA           | NA           | 17.76        | 0.84  | NA                | SD (Dist = 5m; $b = 0.001$ ) | <b>3.77</b><br><b>(0.052)</b> |

|                      |                            |        |       |       |       |       |        |      |                                          |                                 |                                 |
|----------------------|----------------------------|--------|-------|-------|-------|-------|--------|------|------------------------------------------|---------------------------------|---------------------------------|
|                      |                            | Model5 | 1.73  | 0.36  | NA    | 1.03  | 17.997 | 0.85 | Gaus – Range<br>( $\varphi = 4.5$ )      | SD (Dist = 5m;<br>$b = 0.001$ ) |                                 |
| Ibaadan_2014_<br>C1  | HI<br>(282<br>&<br>265)    | Base   | 0.02  | NA    | NA    | NA    | <5e-3  | 0.46 | NA                                       | NA                              | <b>10.62</b><br><b>(0.005)</b>  |
|                      |                            | Model1 | 0.02  | <5e-3 | NA    | NA    | <5e-3  | 0.46 | NA                                       | NNc (all<br>neighbors)          | 1.15<br>(0.284)                 |
|                      |                            | Model5 | 0.02  | <5e-3 | NA    | 1e-3  | <5e-3  | 0.45 | Gaus – Range<br>( $\varphi = 140$ )      | NNc (all<br>neighbors)          |                                 |
| Ikenne_2013_C1       | DM<br>(627<br>&<br>611)    | Base   | 25.10 | NA    | NA    | NA    | 4.39   | 0.32 | NA                                       | NA                              | <b>7.89</b><br><b>(0.019)</b>   |
|                      |                            | Model1 | 25.71 | 0.16  | NA    | NA    | 3.76   | 0.33 | NA                                       | FD ( $\alpha$ 1/Dist)           | <b>4.67</b><br><b>(0.031)</b>   |
|                      |                            | Model5 | 26.96 | 0.02  | NA    | 0.84  | 2.90   | 0.32 | Gaus –<br>isotropic<br>( $\varphi = 9$ ) | FD ( $\alpha$ 1/Dist)           |                                 |
| Ibaadan_2014<br>_PYT | SHT<br>WT<br>(151<br>& 81) | Base   | 23.56 | NA    | NA    | NA    | 101.2  | 0.77 | NA                                       | NA                              | <b>16.15</b><br><b>(0.0003)</b> |
|                      |                            | Model2 | 24.53 | NA    | 27.46 | NA    | 60.52  | 0.67 | NA                                       | Competition<br>error            | <b>10.21</b><br><b>(0.001)</b>  |
|                      |                            | Model5 | 27.78 | NA    | 20.41 | 16.62 | 53.20  | 0.51 | Sph – Range<br>( $\varphi = 0.5$ )       | Competition<br>error            |                                 |

**Figure S1:** Original observation (column 1), direct genotypic BLUP (column 2), and competition BLUP OR competition error BLUP\* (column 3) from model for A) dry root weight (DM), B) harvest index (HI), C) fresh root yield (FYLD), and D) fresh shoot weight (SHTWT). Depicted below are the trials/traits which exhibited significant genetic competition from model 1: A.1) IKN\_2014\_C1, A.2) IKN\_2013\_C1, B.1) IBA\_2014\_C1, B.2) IBA\_2014\_PYT, B.3) IBA\_2013\_C1, B.4) MOK\_2013\_C1, C.1) IBA\_2013\_C1, C.2) MOK\_2013\_C1, C.3) \*MOK\_2014\_C1, and D.1) IKN\_2013\_C1. Missing values were linearly interpolated.

A.1. IKN\_2014\_C1 - DM

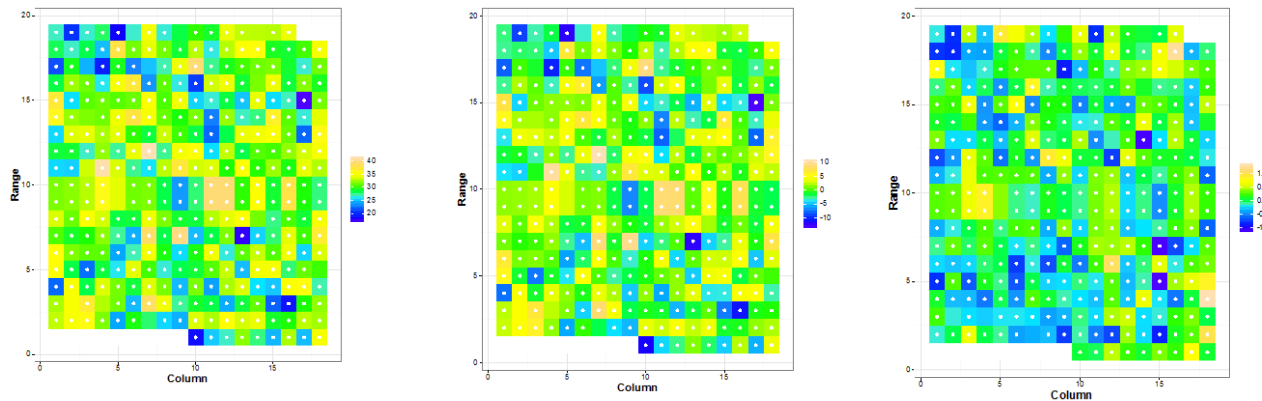

### A.2. IKN\_2013\_C1 - DM

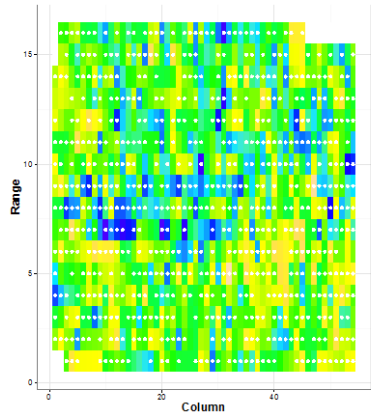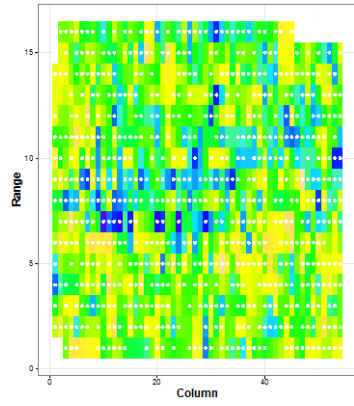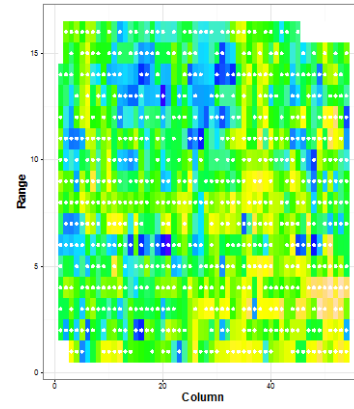

### B.1. IBA\_2014\_C1 - HI

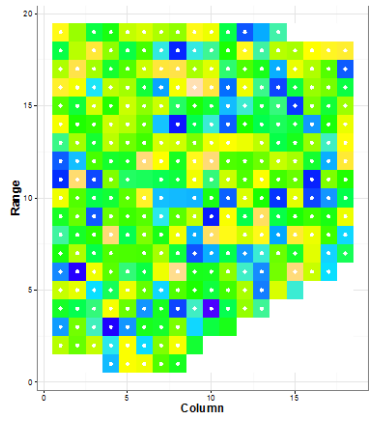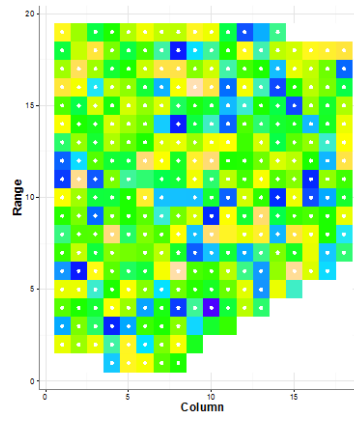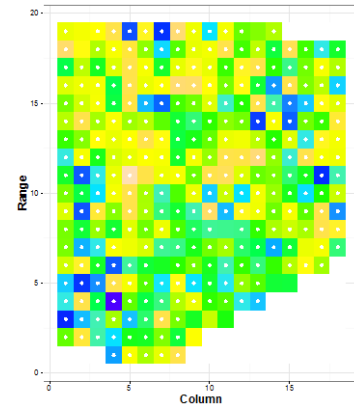

### B.2. IBA\_2014\_PYT - HI

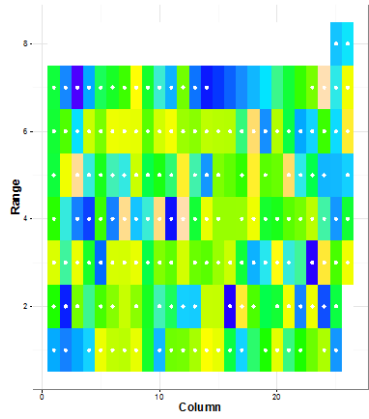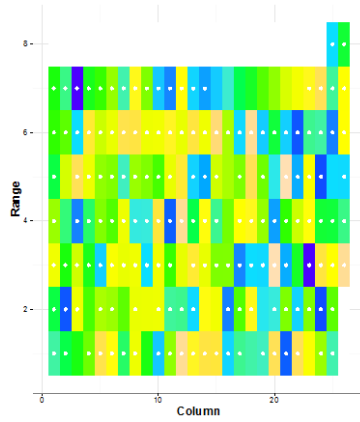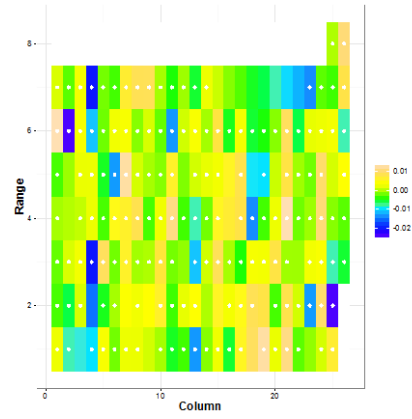

### B.3. IBA\_2013\_C1 - HI

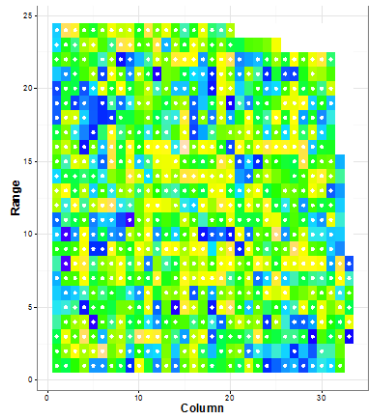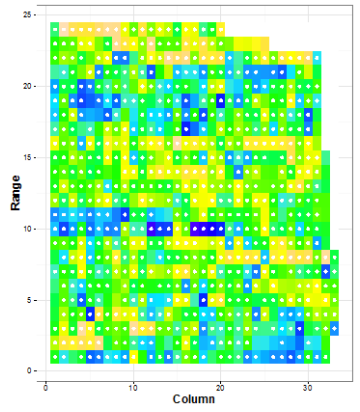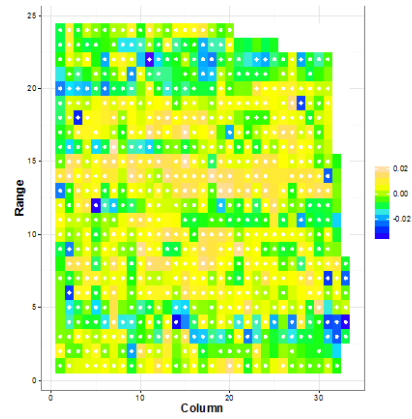

### B.4. MOK\_2013\_C1 - HI

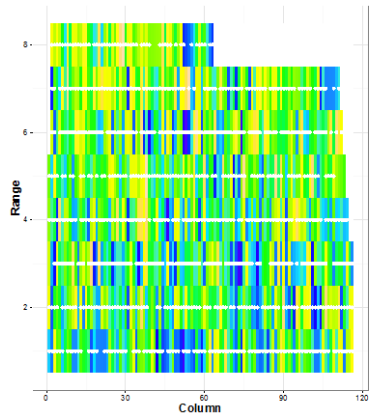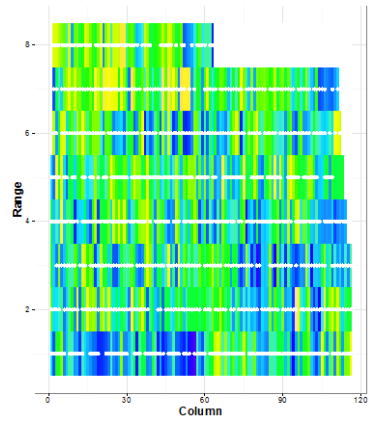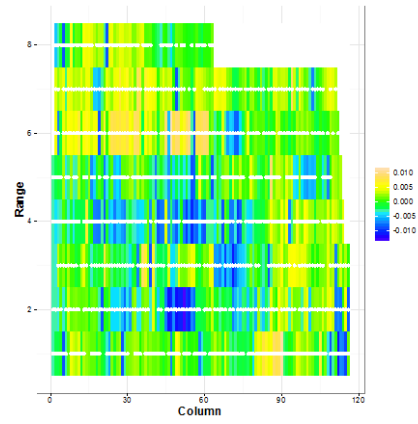

### C.1. IBA\_2013\_C1 - FYLD

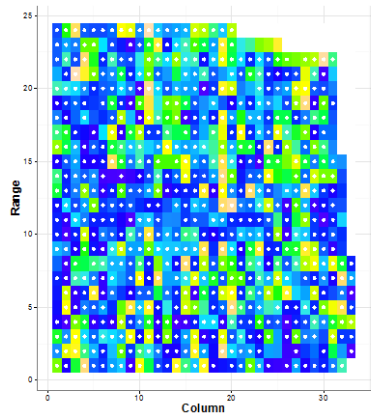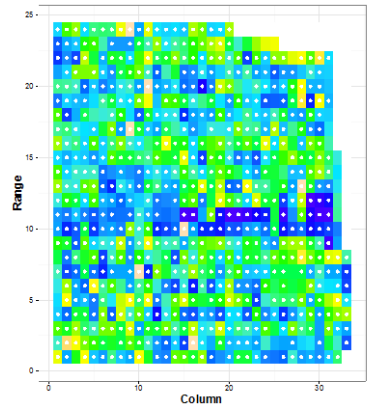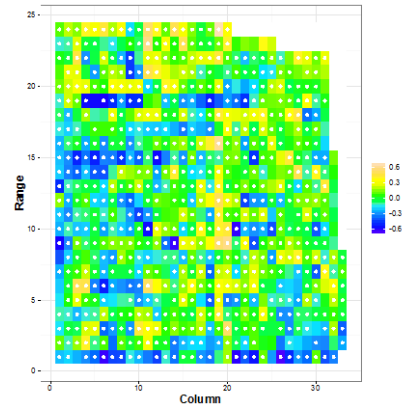



### C.2. MOK\_2013\_C1 - FYLD

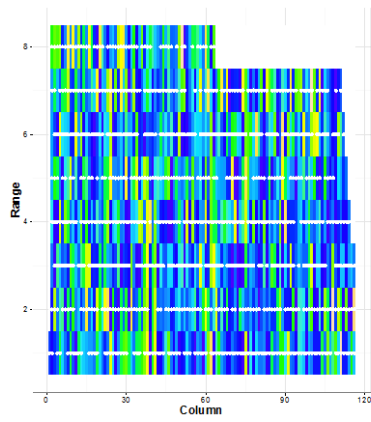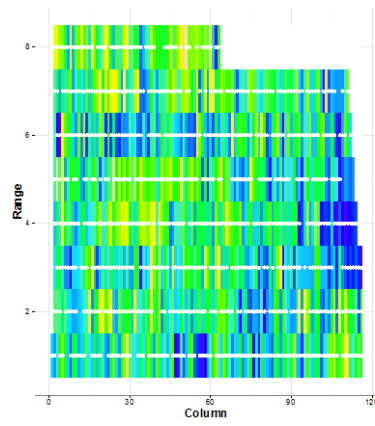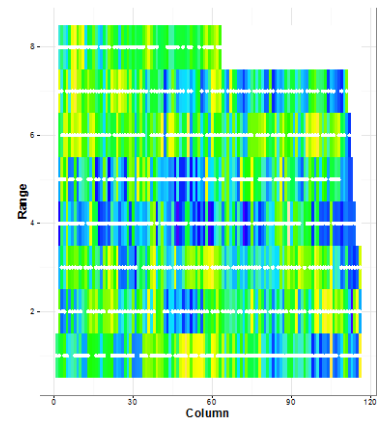

### C.3.\*MOK\_2014\_C1 - FYLD

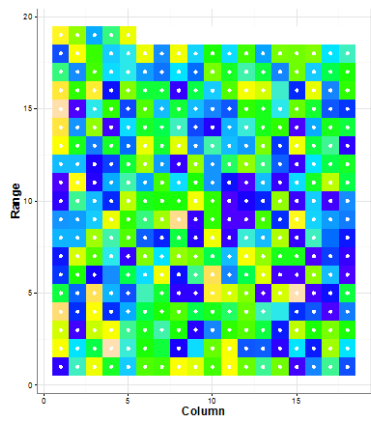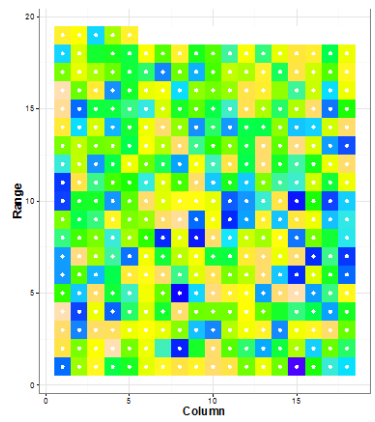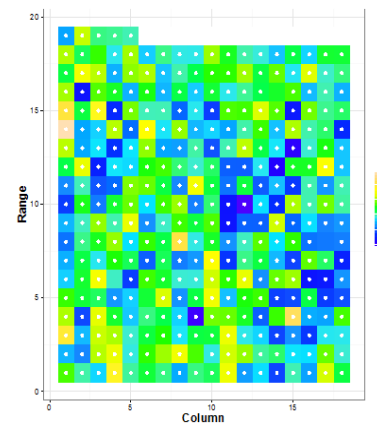

D.1. IKN\_2013\_C1 - SHTWT

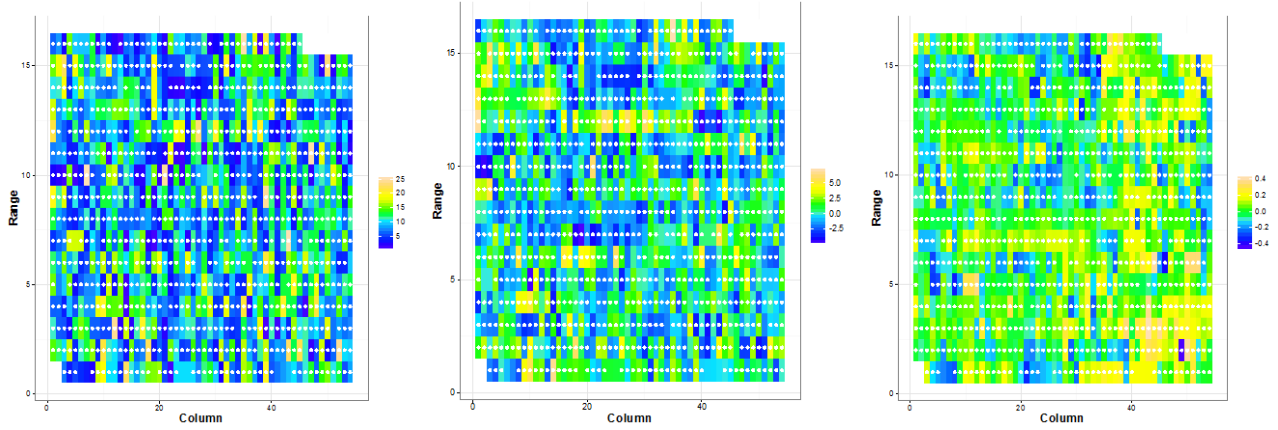

Supplement: FileS1.pdf [file FileS1.pdf]
